# Supplementary material
Source: MDPI journal article supplement (https://www.mdpi.com/2311-7524/8/3/204)
Supplement: s1 [file s1]

**Table S1.** Primers for endpoint and qRT-PCR.

| PCR      | Primer name        | Primer sequence             |
|----------|--------------------|-----------------------------|
| Endpoint | <i>EGFP175F</i>    | 5'-CGTAAACGGCCACAAGTTCA-3'  |
|          | <i>EGFP175R</i>    | 5'-CTTCATGTGGTCGGGGTAGC-3'  |
|          | <i>AtPMI2-368F</i> | 5'-CACGGAGCTTGTAGGAAGCA-3'  |
|          | <i>AtPMI2-368R</i> | 5'-CTGAAGCCGCCATACACTCA-3'  |
|          | <i>CsPMI1-636F</i> | 5'-TGTCTTGGGGGATCGAGTCT-3'  |
|          | <i>CsPMI1-636R</i> | 5'-ACATTGTCGGAGGTTGCCAT-3'  |
|          | <i>CsPMI2435F</i>  | 5'-ACTCCCTCGTTTCCAAGCTG-3'  |
|          | <i>CsPMI2435R</i>  | 5'-AGCTACAAAGGGCCTCGAAC-3'  |
| qPCR     | <i>CsActin7F</i>   | 5'-CCAAGCAGCATGAAGATCAA-3'  |
|          | <i>CsActin7R</i>   | 5'-TGGATGGACCAGACTCATCA-3'  |
|          | <i>EcPMIF</i>      | 5'-AACCGGCTAACCAGTTGTTG-3'  |
|          | <i>EcPMIR</i>      | 5'-CTGCTGGCTAATGGTGGTTT-3'  |
|          | <i>AtPMIF</i>      | 5'-TCCGAATTTACTCGGGTC-3'    |
|          | <i>AtPMIR</i>      | 5'-GTCTCTGTAAAGAAGAGGATC-3' |
|          | <i>CsPMI1F</i>     | 5'-TGATGCAGGTGTCCTAGCAG-3'  |
|          | <i>CsPMI1R</i>     | 5'-CGGAGGTTGCCATACACTCT-3'  |
|          | <i>CsPMI2F</i>     | 5'-AATGGTGGGTGTGGTGAGAT-3'  |
|          | <i>CsPMI2R</i>     | 5'-GACAATGCTTTCGCAACTGA-3'  |

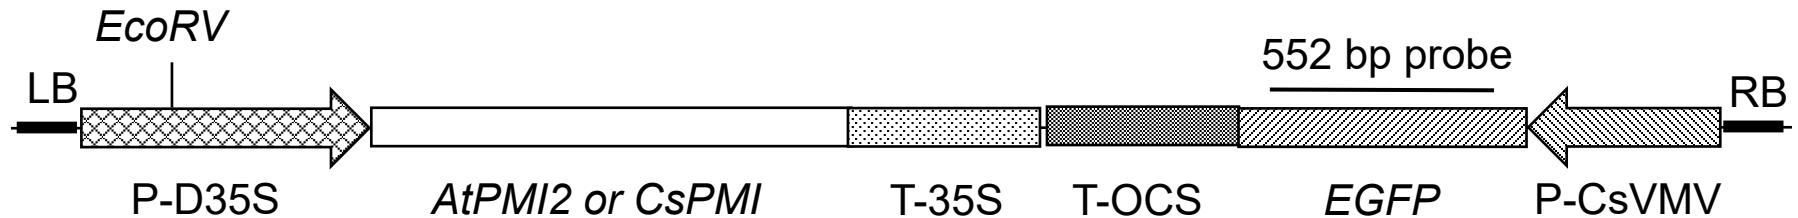

**Figure S1.** The expression cassettes of plasmid 2300*AtPMI2*, 2300*CsPMI2* or 2300*PMI1*. The diagram depicts the left border (LB) T-DNA; P-D35S, the duplex cauliflower mosaic virus 35S promoter; *AtPMI2* or *CsPMI*, one of the following genes: *AtPMI2*, the coding region of *Arabidopsis thaliana* phosphomannose isomerase gene (accession: NM\_105377), *CsPMI2*, the coding region of *Citrus sinensis* phosphomannose isomerase 1 gene (accession: XM\_006482179) or *CsPMI1*, the coding region of *Citrus sinensis* phosphomannose isomerase 1-like gene (accession: XM\_006469025); T-Nos, the nopaline synthase gene terminator; T-OCS, the octopine synthase gene terminator; *EGFP*, enhanced green fluorescence protein gene; P- CsVMV, the cassava vein mosaic virus promoter; RB, T-DNA right border; *EcoRV*, restriction site. The 552 bp probe in the *EGFP* coding region was used for Southern blot analysis.
